# Supplementary material
Source: Springer Nature journal article supplement (https://www.springermedizin.de/resource/supplementary/12875_2008_357_MOESM2_ESM.pdf/9434436)

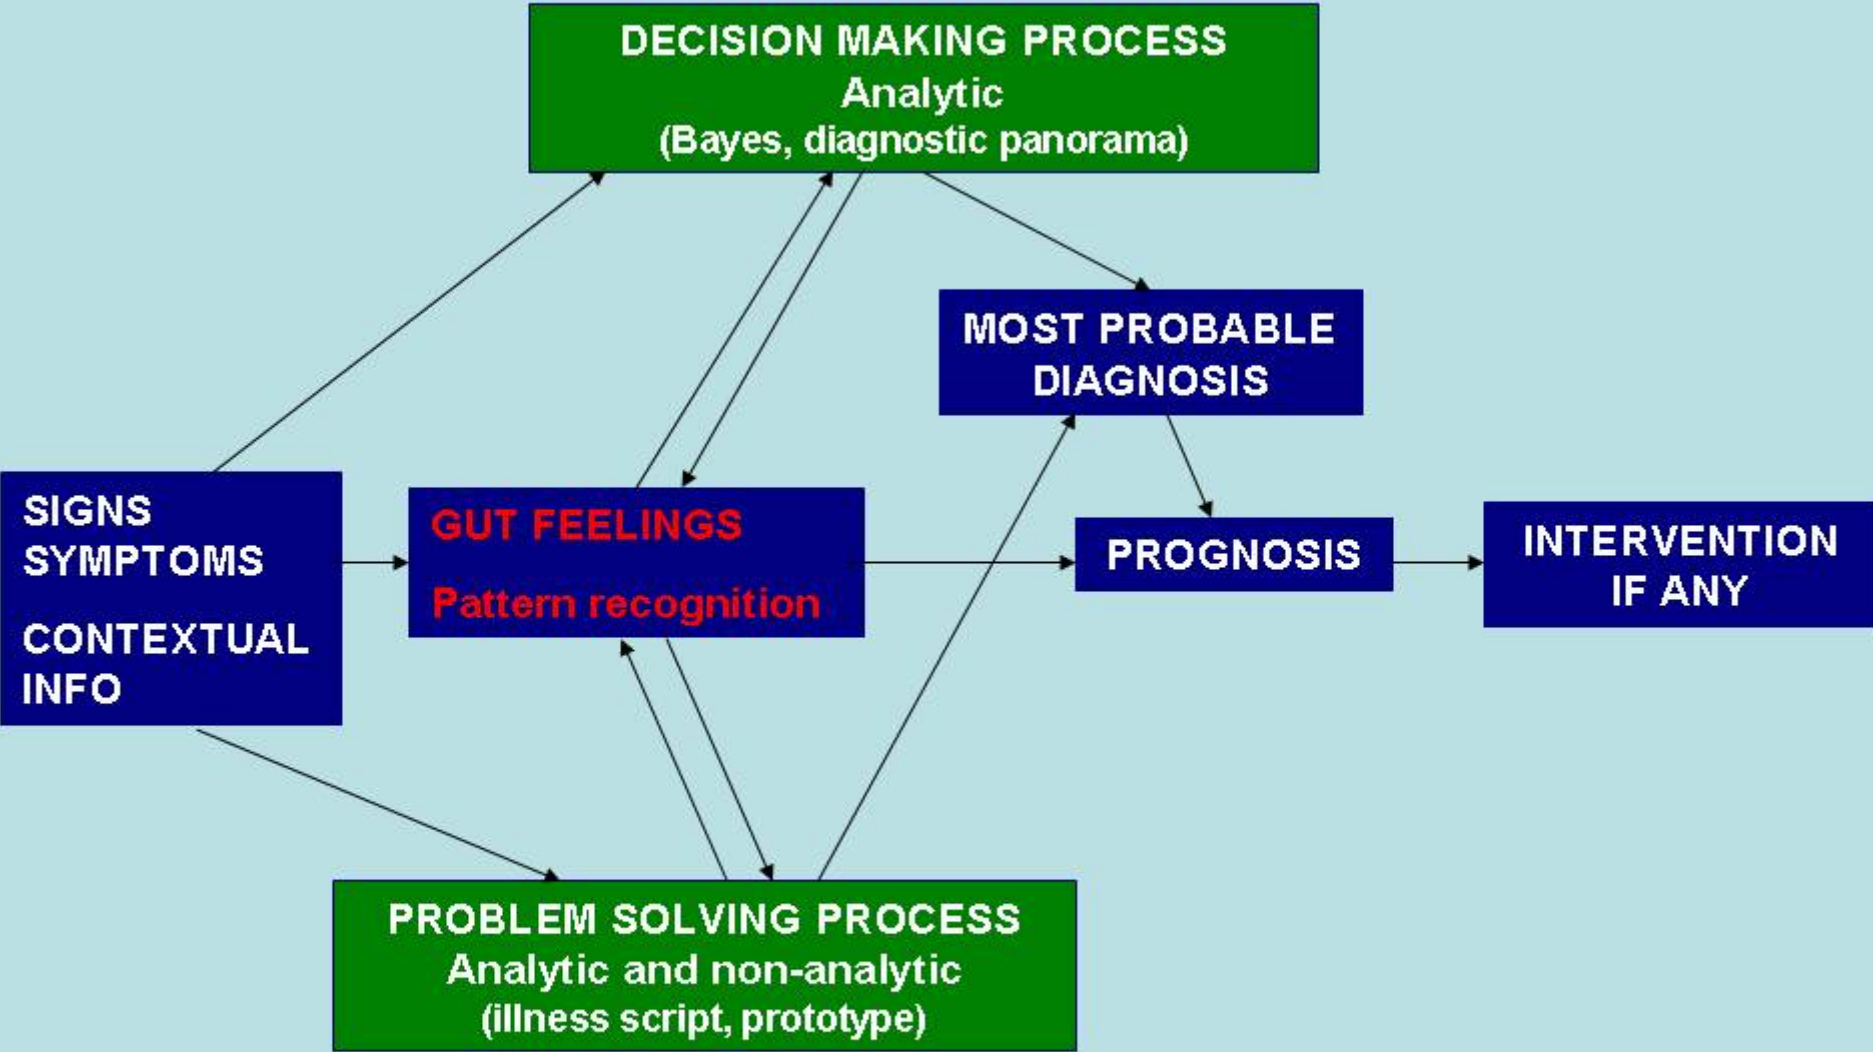

Supplement: MOESM2 [file 9434436]
